# Supplementary material
Source: Royal Society of Chemistry journal article supplement (doi:10.1039/d6ay00714g)
Supplement: d6ay00714g1.pdf [file d6ay00714g1.pdf]

## Supplementary Information

### **Ion mobility spectrometry coupled with chemometrics for the rapid identification of six pesticide residues in rice samples**

Pan Meng<sup>a,b</sup>, Peng Li<sup>c</sup>, Dairong Ding<sup>a,b</sup>, Yuqi Gong<sup>a,b</sup>, Xinyi Guo<sup>a,b</sup> and Min Sha<sup>a,b\*</sup>

<sup>a</sup> School of Management Science and Engineering, Nanjing University of Finance and Economics, Nanjing 210023, China;

<sup>b</sup> Key Laboratory of Food Processing and Quality Control, Nanjing University of Finance and Economics, Nanjing 210023, China;

<sup>c</sup> School of Food Science and Engineering, Nanjing University of Finance and Economics, Nanjing 210023, China.

E-mail for the \*corresponding author: [minsha@nufe.edu.cn](mailto:minsha@nufe.edu.cn) (M.S.)

**Table S1.** Numbers and corresponding concentrations of the solvent standard solutions for isoprothiolane (A) and propanil (B).

| Solution Number for<br>Isoprothiolane (A) | Solution Number for<br>Propanil (B) | Concentration (mg/L) |
|-------------------------------------------|-------------------------------------|----------------------|
| M <sub>1</sub>                            | M <sub>2</sub>                      | 0.0488               |
| L <sub>1</sub>                            | L <sub>2</sub>                      | 0.0977               |
| K <sub>1</sub>                            | K <sub>2</sub>                      | 0.1953               |
| J <sub>1</sub>                            | J <sub>2</sub>                      | 0.3906               |
| I <sub>1</sub>                            | I <sub>2</sub>                      | 0.7813               |
| H <sub>1</sub>                            | H <sub>2</sub>                      | 1.5625               |
| G <sub>1</sub>                            | G <sub>2</sub>                      | 3.125                |
| F <sub>1</sub>                            | F <sub>2</sub>                      | 6.25                 |
| E <sub>1</sub>                            | E <sub>2</sub>                      | 12.5                 |
| D <sub>1</sub>                            | D <sub>2</sub>                      | 25                   |
| C <sub>1</sub>                            | C <sub>2</sub>                      | 50                   |
| B <sub>1</sub>                            | B <sub>2</sub>                      | 100                  |
| A <sub>1</sub>                            | A <sub>2</sub>                      | 1000                 |

**Table S2.** Preparation details of the mixed spiked solutions of isoprothiolane (A) and propanil (B).

| Set            | No. | Minitab taguchi design level |   | Concentration level (mg/L) |       | Volume of each solution         |                                 |         |
|----------------|-----|------------------------------|---|----------------------------|-------|---------------------------------|---------------------------------|---------|
|                |     | A                            | B | A                          | B     | Solvent standard solution for A | Solvent standard solution for B | Solvent |
| Training set   | 1   | 1                            | 1 | 0.391                      | 0.391 | 0.5 mL G <sub>1</sub>           | 0.5 mL G <sub>2</sub>           | 3 mL    |
|                | 2   | 1                            | 2 | 0.391                      | 0.781 | 0.5 mL G <sub>1</sub>           | 0.5 mL F <sub>2</sub>           | 3 mL    |
|                | 3   | 1                            | 3 | 0.391                      | 1.563 | 0.5 mL G <sub>1</sub>           | 0.5 mL E <sub>2</sub>           | 3 mL    |
|                | 4   | 1                            | 4 | 0.391                      | 3.125 | 0.5 mL G <sub>1</sub>           | 0.5 mL D <sub>2</sub>           | 3 mL    |
|                | 5   | 2                            | 1 | 0.781                      | 0.391 | 0.5 mL F <sub>1</sub>           | 0.5 mL G <sub>2</sub>           | 3 mL    |
|                | 6   | 2                            | 2 | 0.781                      | 0.781 | 0.5 mL F <sub>1</sub>           | 0.5 mL F <sub>2</sub>           | 3 mL    |
|                | 7   | 2                            | 3 | 0.781                      | 1.563 | 0.5 mL F <sub>1</sub>           | 0.5 mL E <sub>2</sub>           | 3 mL    |
|                | 8   | 2                            | 4 | 0.781                      | 3.125 | 0.5 mL F <sub>1</sub>           | 0.5 mL D <sub>2</sub>           | 3 mL    |
|                | 9   | 3                            | 1 | 1.563                      | 0.391 | 0.5 mL E <sub>1</sub>           | 0.5 mL G <sub>2</sub>           | 3 mL    |
|                | 10  | 3                            | 2 | 1.563                      | 0.781 | 0.5 mL E <sub>1</sub>           | 0.5 mL F <sub>2</sub>           | 3 mL    |
|                | 11  | 3                            | 3 | 1.563                      | 1.563 | 0.5 mL E <sub>1</sub>           | 0.5 mL E <sub>2</sub>           | 3 mL    |
|                | 12  | 3                            | 4 | 1.563                      | 3.125 | 0.5 mL E <sub>1</sub>           | 0.5 mL D <sub>2</sub>           | 3 mL    |
|                | 13  | 4                            | 1 | 3.125                      | 0.391 | 0.5 mL D <sub>1</sub>           | 0.5 mL G <sub>2</sub>           | 3 mL    |
|                | 14  | 4                            | 2 | 3.125                      | 0.781 | 0.5 mL D <sub>1</sub>           | 0.5 mL F <sub>2</sub>           | 3 mL    |
|                | 15  | 4                            | 3 | 3.125                      | 1.563 | 0.5 mL D <sub>1</sub>           | 0.5 mL E <sub>2</sub>           | 3 mL    |
|                | 16  | 4                            | 4 | 3.125                      | 3.125 | 0.5 mL D <sub>1</sub>           | 0.5 mL D <sub>2</sub>           | 3 mL    |
| Validation set | 17  | 1                            | 2 | 0.5                        | 1     | 0.32 mL F <sub>1</sub>          | 0.32 mL F <sub>2</sub>          | 3.36 mL |
|                | 18  | 1                            | 3 | 0.5                        | 1.5   | 0.32 mL F <sub>1</sub>          | 0.64 mL F <sub>2</sub>          | 3.04 mL |
|                | 19  | 2                            | 2 | 1                          | 1     | 0.64 mL F <sub>1</sub>          | 0.32 mL F <sub>2</sub>          | 3.04 mL |
|                | 20  | 2                            | 3 | 1                          | 1.5   | 0.64 mL F <sub>1</sub>          | 0.64 mL F <sub>2</sub>          | 2.72 mL |
|                | 21  | 3                            | 2 | 1.5                        | 1     | 0.24 mL D <sub>1</sub>          | 0.16 mL E <sub>2</sub>          | 3.6 mL  |
|                | 22  | 3                            | 3 | 1.5                        | 1.5   | 0.24 mL D <sub>1</sub>          | 0.32 mL E <sub>2</sub>          | 3.44 mL |
|                | 23  | 4                            | 2 | 2                          | 1     | 0.32 mL D <sub>1</sub>          | 0.16 mL E <sub>2</sub>          | 3.52 mL |
|                | 24  | 4                            | 3 | 2                          | 1.5   | 0.32 mL D <sub>1</sub>          | 0.32 mL E <sub>2</sub>          | 3.36 mL |

**Table S3.** Peak intensity values corresponding to different concentrations of carbendazim standard solutions at 9.927 ms.

| Concentration (mg/L) | Peak Intensity Value |
|----------------------|----------------------|
| 0.04883              | 1.195797             |
| 0.09766              | 1.786731             |
| 0.19531              | 2.659581             |
| 0.39063              | 4.976288             |
| 0.78125              | 7.53898              |
| 1.5625               | 10.41300244          |
| 3.125                | 10.81165471          |
| 6.25                 | 10.81190267          |

**Table S4.** Peak intensity values corresponding to different concentrations of flutolanil standard solutions at 14.079 ms.

| Concentration (mg/L) | Peak Intensity Value |
|----------------------|----------------------|
| 0.1953125            | 1.62915394           |
| 0.390625             | 1.73781459           |
| 0.78125              | 1.98169018           |
| 1.5625               | 2.51557757           |
| 3.125                | 5.30126309           |
| 6.25                 | 10.41300244          |
| 12.5                 | 10.81165471          |
| 25                   | 10.81190267          |

**Table S5.** Peak intensity values corresponding to different concentrations of pirimiphos-methyl standard solutions at 12.836 ms.

| Concentration (mg/L) | Peak Intensity Value |
|----------------------|----------------------|
| 0.0488               | 1.54457961           |
| 0.0977               | 1.79743223           |
| 0.1953               | 2.04262666           |
| 0.390625             | 3.02739687           |
| 0.78125              | 3.88944724           |
| 1.5625               | 5.05762937           |
| 3.125                | 7.33010082           |
| 6.25                 | 9.0291605            |
| 12.5                 | 9.80669851           |

**Table S6.** Peak intensity values corresponding to different concentrations of carbendazim matrix standard solutions at 9.914 ms.

| Concentration (mg/L) | Peak Intensity Value |
|----------------------|----------------------|
| 0.0488               | 0.4016378            |
| 0.09766              | 0.49517052           |
| 0.1953125            | 0.65965523           |
| 0.390625             | 0.90353857           |
| 0.78125              | 1.41689547           |
| 1.5625               | 2.59273858           |
| 3.125                | 3.32604957           |
| 6.25                 | 4.62136822           |
| 12.5                 | 6.66956139           |
| 25                   | 9.95048676           |

**Table S7.** Peak intensity values corresponding to different concentrations of flutolanil matrix standard solutions at 14.079 ms.

| Concentration (mg/L) | Peak Intensity Value |
|----------------------|----------------------|
| 0.1953               | 1.21132021           |
| 0.3906               | 1.44815384           |
| 0.78125              | 1.22270755           |
| 1.5625               | 1.30998145           |
| 3.125                | 1.60265458           |
| 6.25                 | 2.43126898           |
| 12.5                 | 3.33163866           |
| 25                   | 4.38325307           |
| 50                   | 5.35753183           |

**Table S8.** Peak intensity values corresponding to different concentrations of pirimiphos-methyl matrix standard solutions at 12.836 ms.

| Concentration (mg/L) | Peak Intensity Value |
|----------------------|----------------------|
| 0.1953               | 1.04895086           |
| 0.3906               | 1.04986304           |
| 0.78125              | 1.24496818           |
| 1.5625               | 1.49466177           |
| 3.125                | 2.02364126           |
| 6.25                 | 2.89871514           |
| 12.5                 | 3.83053813           |
| 25                   | 5.98262897           |
| 50                   | 8.05755048           |

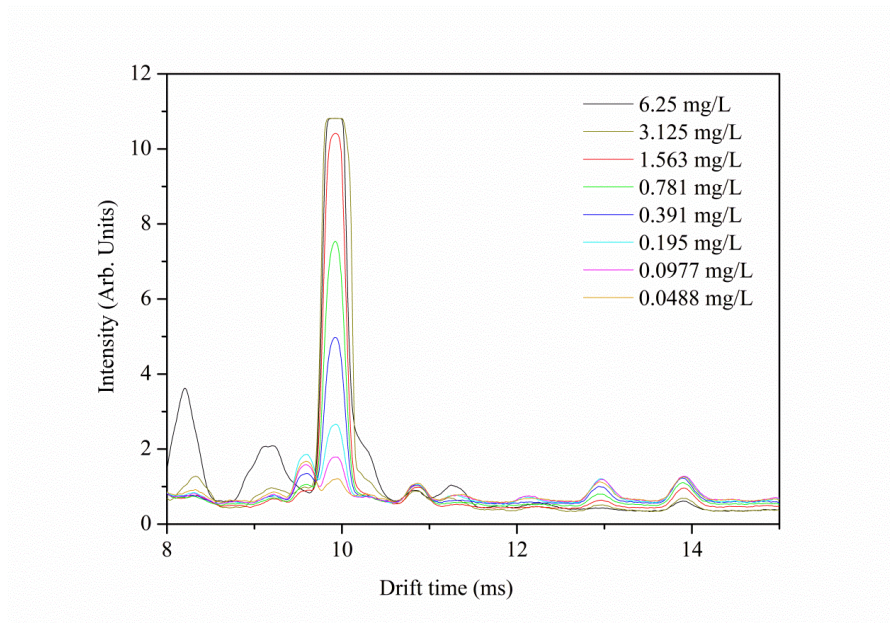

**Fig. S1.** Ion mobility spectra of carbendazim standard solutions at different concentrations.

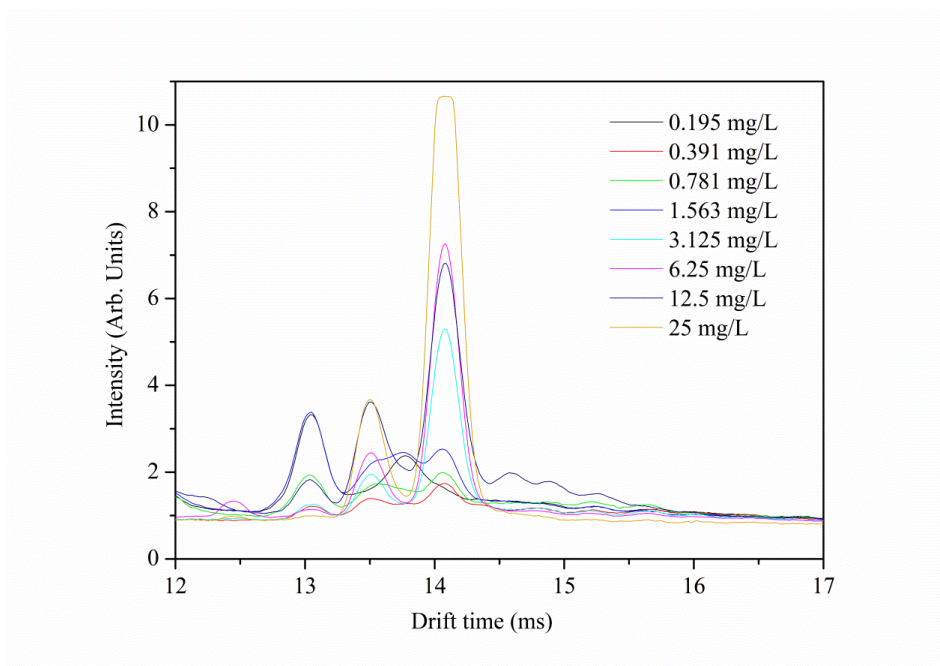

**Fig. S2.** Ion mobility spectra of flutolanil standard solutions at different concentrations.

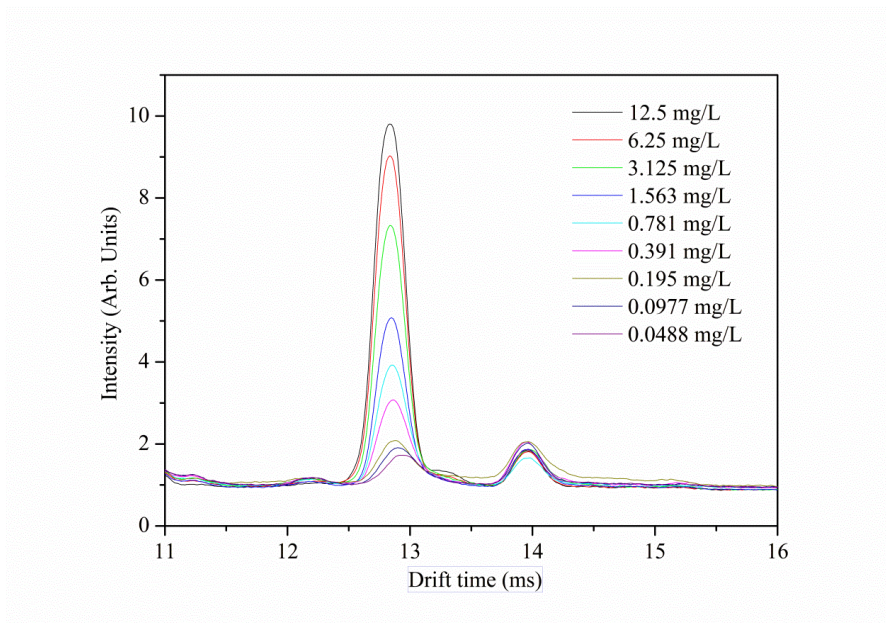

**Fig. S3.** Ion mobility spectra of pirimiphos-methyl standard solutions at different concentrations.

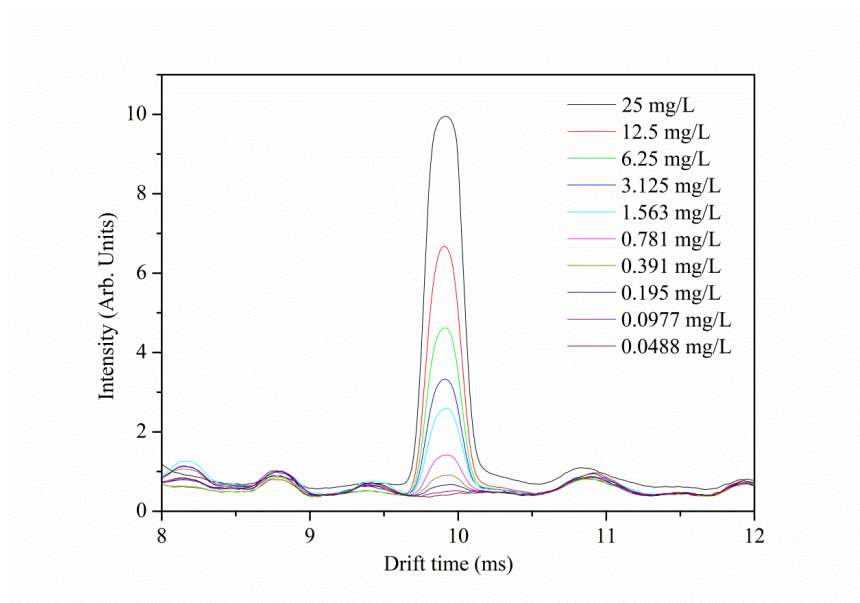

**Fig. S4.** Ion mobility spectra of carbendazim matrix standard solutions at different concentrations.

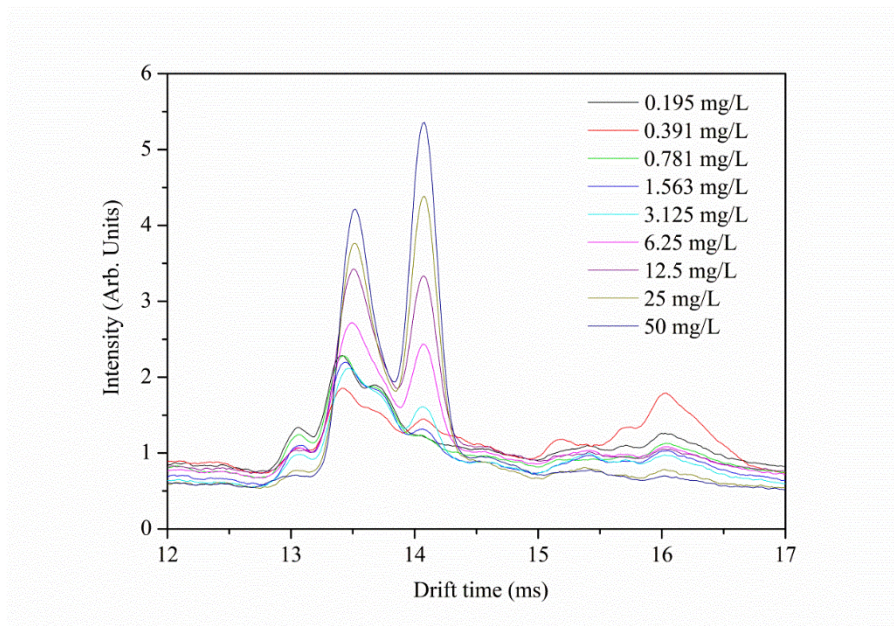

**Fig. S5.** Ion mobility spectra of flutolanil matrix standard solutions at different concentrations.

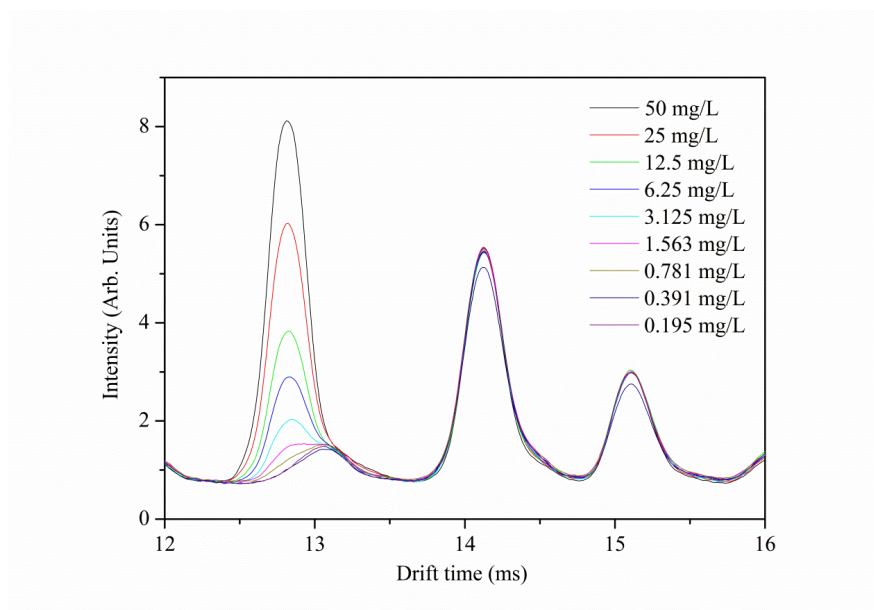

**Fig. S6.** Ion mobility spectra of pirimiphos-methyl matrix standard solutions at different concentrations.

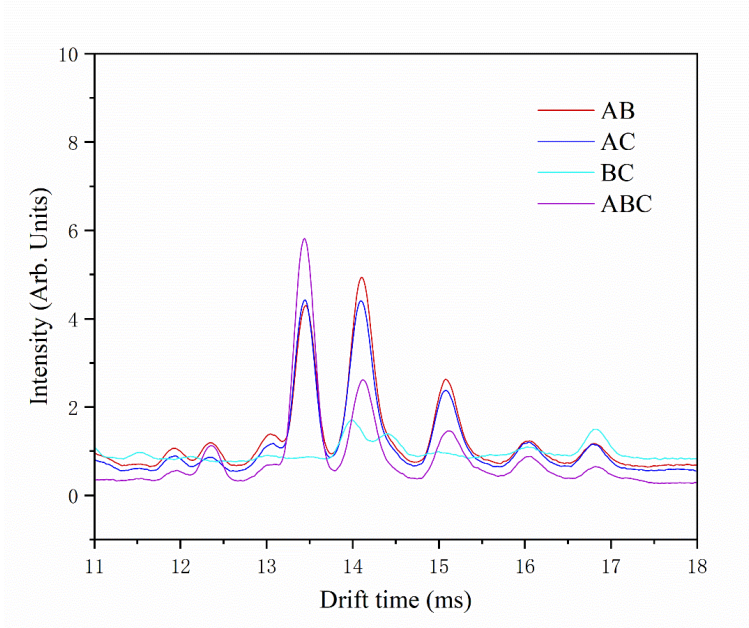

**Fig. S7.** Ion mobility spectra of the matrix standard solutions of mixed pesticide samples spiked at a concentration of 3.125 mg/L in positive ionization mode.

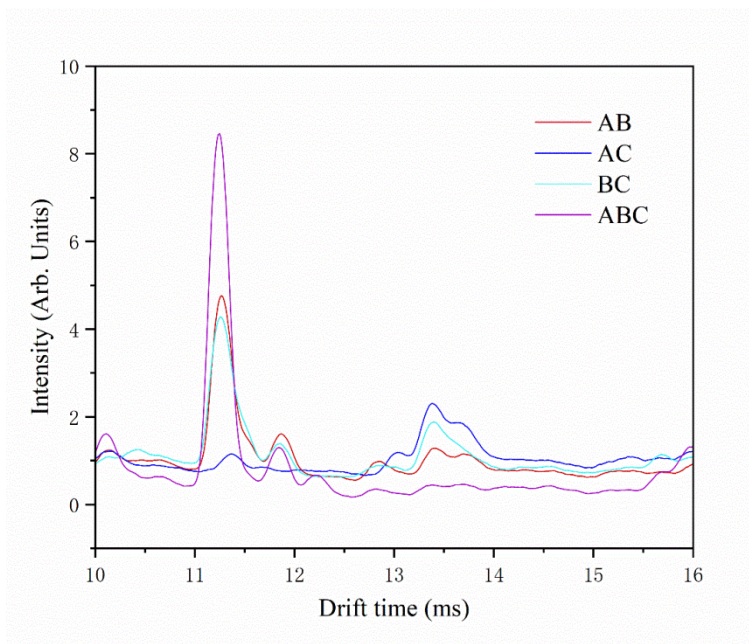

**Fig. S8.** Ion mobility spectra of the matrix standard solutions of mixed pesticide samples spiked at a concentration of 3.125 mg/L in negative ionization mode.
